# Supplementary material for: Uncovering the action mechanism of polydatinvianetwork pharmacological target prediction
Source: Royal Society of Chemistry journal article supplement (doi:10.1039/c8ra03124j), 2018-01-01
Supplement: c8ra03124j1.xlsx [file c8ra03124j1.xlsx]

## Sheet: Sheet1
293 targets of PharmMapper (Homo sapiens)	135 targets of ChemMapper (Homo sapiens)
PIM1	LTA4H
CASP3	SULT1B1
CMA1	TTR
AMPM1	NQO2
CLPP	GRM5
CCNA2	CYP19A1
ALBU	ESR1
GSTA1	AKT1
HXK1	PTGS1
CATS	CALM3
PDE4B	PTGS2
IMPA1	ESR2
HS90A	CYP1A2
EPHB4	CYP1B1
PPIA	CYP1A1
PNPH	APP
CHK1	CYP11B2
TREM1	TUBB1
STK6	HSD17B1
MTAP	HSD17B2
CDK2	TUBB2C
GLCM	TUBB3
EGFR	TUBB4
AMY1	TUBB8
ANPRC	LCK
SEPR	ABL1
CHLE	BCR
LPPL	CYP11B1
BAG1	GRM4
ALDR	SENP7
HCK	CYP3A4
PYGL	TUBB
ESR1	CHRNB2
PRGR	ERBB2
APOA2	CHRNA3
PDE3B	ALOX5
ESR2	UBE2N
DHB11	CASP3
PPARG	CISD1
FNTA	TERT
FCAR	EGFR
ALDH2	CHRNB4
DAPK1	CHRNB1
NQO2	CHRNB3
GALK1	SENP6
CATD	NFKB1
ANGI	RELA
DPP4	SOAT2
PDPK1	XDH
HSD17B1	CHEK1
NOS3	CYP2C9
MAPK14	KLF5
TGFR1	FABP4
ANDR	S1PR1
NR1H2	ADRB2
TYSY	ABCB1
ADH1B	SENP8
ACK1	MAOA
DCAM	PDGFRB
DYR	PDGFRA
CASP7	ODC1
THRB	CYSLTR1
KC1G2	CYSLTR2
DHSO	CA9
MMP13	CA14
PYRD	CA12
C1R	CA5A
SULT2A1	CYP2C19
MIF	SIGMAR1
BMP7	CA5B
GSR	TYR
IGF1R	CA1
SRC	MAOB
PDE4D	CA3
CHIT1	CA2
FA10	CA4
MK10	PTPN1
KIF11	CHRNA2
AK1C3	CA7
UROK	SLC6A2
CATK	CA13
NQO1	KCNH2
SHBG	SYK
TYPH	CYP2B6
ADA17	CA6
CSNK2A1	MYLK
ANXA5	DUSP3
CACP	XBP1
AKT1	CHRNA4
MCR	PTPN7
CBR1	CYP2D6
ERR3	PTPN22
ADHX	PTPN12
MMP8	NOD2
FHIT	SIRT1
HSD11B1	BACE1
LEG7	CTSL1
ADH1C	NQO1
RTN4R	CD38
CDK6	SLC5A1
IGLV2-8	PYGB
PPARD	SELE
AMYP	CALM
RHEB	SLC5A2
AOFB	TOP1
VGFR2	LGALS3
LKHA4	ALDH2
A1AT	SELP
CFAD	AKR1B1
PRKACA	TOP2A
SOD2	LTA4H
PNPO	P2RY12
GSK3B	FUT10
DCK	DRD2
ZA2G	STS
VTDB	PRKCA
PH4H	ASGR1
RHOA	HSP90AA1
CFAB	STK33
REG1A	ATP5A1
BCAT2	ATP5B
RAC2	CSNK2A1
MMP3	UQCR10
LGUL	SDHA
CATB	SDHB
B3GA1	SDHD
TNNC1	ETFDH
HEXB	SDHC
ABO	ABO
PLK1	CYC1
LEG2	UQCRC1
BRAF1	UQCRC2
MTHFD1	UQCRH
SAHH	UQCRQ
LCK	UQCRFS1
ITK
PCK1
TPIS
TRAPPC3
JAK3
CDD
NOS2
HMDH
CCNT1
AMY
PARP1
PTN1
IGF1A
RENI
MAN1B1
ARF1
PDE5A
EST1
ELNE
HYES
NCS1
PYR5
HDAC8
ATOX1
TGM3
PTGD2
AKR1C1
ISG20
PLA2G2A
TGM2
IMDH2
PAK7
OTC
BST1
RNASE4
APCS
KSYK
YARS
MMP12
SEC14L2
ADAM17
RB11A
RAB5A
PTN11
MMP7
G6PI
LDHB
LEG3
FA7
MAOM
FGFR1
MK08
MET
HPN
ARHGAP1
MAPKAPK2
AMPM2
GNPDA
UCK2
PPAP
RNASE3
SSE1
MDM2
TPH1
PDHB
IL2
THRA
ADK
ZAP70
JAK2
ACADM
AK1C2
HNF4G
KPCT
SRM
FKB1A
KIT
PAK6
AKT2
ARGI2
CD1A
ERBB4
FABP5
ALDOA
GM2A
APRT
FABP4
PPARA
CP2C9
MMP2
BLVRB
S10A9
CSK
CP2C8
CCL5
LYAM3
GLYC
KAT1
PDK2
INSR
BIRC7
ARSA
THRB2
RXRA
PADI4
RASH
LYZ
NMNAT1
ST14
PPCDC
CATA
GALE
KTHY
MMP9
NR1H3
SETD7
CLK1
DPEP1
HADH
XIAP
C1S
CD209
PK3CG
GCR
PUR2
RET4
HXK4
FPPS
HSP90AB1
TK1
C8G
NEP
PNMT
GSTT2
EPHA2
CDC42
NR1H4
MMP1
HINT1
BHMT
GSTM1
CTSF
GSTM2
NT5M
CD5R1
MK01
CAH2
CAH1
TGFR2
DDX6
NUDT9
TTHY
CATL2
ICAM2
STS
CAH12
ERG7
BACE1
